# Supplementary material for: Comparative Analysis of Library Preparation Approaches for SARS-CoV-2 Genome Sequencing on the Illumina MiSeq Platform
Source: MDPI journal article supplement (doi:10.3390/ijms24032374), 2023-01-25
Supplement: s1 [file s1]

**Table S4.** Number of raw reads for each of three approaches

|                            | KAPA HyperCap<br>SARS-CoV-2 | QIAseq DIRECT<br>SARS-CoV-2 | TruSeq DNA Nano<br>with custom primer<br>panel |
|----------------------------|-----------------------------|-----------------------------|------------------------------------------------|
| Minimum<br>number of reads | 12813                       | 10794                       | 179646                                         |
| Maximum<br>number of reads | 3402936                     | 707446                      | 359999                                         |
| Mean                       | 480964                      | 161294                      | 254036                                         |
| Median                     | 134720                      | 100524                      | 258838                                         |

**Table S5.** Percent of remaining reads after trimming for each of three approaches

|        | KAPA HyperCap<br>SARS-CoV-2 | QIAseq DIRECT<br>SARS-CoV-2 | TruSeq DNA Nano<br>with custom primer<br>panel |
|--------|-----------------------------|-----------------------------|------------------------------------------------|
| Min    | 12.78                       | 5.13                        | 91.98                                          |
| Max    | 83.45                       | 81.85                       | 95.36                                          |
| Mean   | 39.21                       | 55.83                       | 93.79                                          |
| Median | 34.42                       | 59.82                       | 93.81                                          |

**Table S6.** Percent of genomic coverage for each of three approaches

|        | KAPA HyperCap<br>SARS-CoV-2 | QIAseq DIRECT<br>SARS-CoV-2 | TruSeq DNA Nano<br>with custom primer<br>panel |
|--------|-----------------------------|-----------------------------|------------------------------------------------|
| Min    | 99.70                       | 50.71                       | 93.90                                          |
| Max    | 99.99                       | 97.64                       | 99.02                                          |
| Mean   | 99.86                       | 88.00                       | 97.98                                          |
| Median | 99.87                       | 92.12                       | 98.25                                          |

**Table S7.** Number of variants for each of three approaches

|        | KAPA HyperCap<br>SARS-CoV-2 | QIAseq DIRECT<br>SARS-CoV-2 | TruSeq DNA Nano<br>with custom primer<br>panel |
|--------|-----------------------------|-----------------------------|------------------------------------------------|
| Min    | 65                          | 31                          | 64                                             |
| Max    | 78                          | 69                          | 76                                             |
| Mean   | 72.28                       | 56.65                       | 71                                             |
| Median | 73.00                       | 58.50                       | 71                                             |
